# Supplementary material for: A step Towards Environmental Mitigation In South Africa: Does Trade Liberalisation Really Matter? Fresh Evidence From A Novel Dynamic ARDL Simulations Approach
Source: Research Square preprint supplement (doi:10.21203/rs.3.rs-419113/v1), 2021-05-04
Supplement: Supplementary file 1 [file 44376e9172b6c27682f001cc.xlsx]

## Sheet: Sheet1
Year	CO2	IGDP	TECH	FDI	EC	GDPPC	GFCF	GDP	POP_Total	EXP	IMP	EXPNGN	EXPCHN	EXPBRZ	EXPIND	EXPUSA	EXPUK	EXPBOS	EXPKEN	EXPFRA	IMPNGN	IMPCHN	IMPBRZ	IMPIND	IMPUSA	IMPUK	IMPBOS	IMPKEN	IMPFRA
1960	1.2392	35.9453	3678	149210	23.9843	433.941	19.7376	7.57525e+09	17396367	29.5509	24.5611	9.2415	4.30583	7.05905	4.51004	4.96963	20.208	26.2756	31.0957	14.3963	16.925	4.42827	7.11729	6.9098	4.19658	21.5927	39.6439	33.6701	12.5692
1961	1.2454	36.1721	3689	153480	24.9842	444.896	19.0167	7.97284e+09	17850045	29.324	21.2994	9.18513	3.87081	7.27941	4.3488	4.8997	19.8953	27.2163	32.7172	13.9192	16.2999	3.48941	7.33946	6.02394	4.02982	20.2399	42.5255	31.13	12.3388
1962	1.2138	36.1944	3729	156810	25.8532	461.798	18.2867	8.49783e+09	18322335	29.4069	20.659	8.26914	4.05266	3.86876	4.21277	4.80912	19.4231	27.926	32.0378	12.833	13.5604	2.90828	5.18897	6.09901	4.13155	19.6213	44.839	30.1252	12.1169
1963	1.1738	36.3096	3789	161315	27.9843	498.602	20.517	9.42321e+09	18809939	28.6139	23.1912	8.77917	4.00545	9.03645	4.32547	4.87003	19.324	28.9944	32.0329	12.5958	13.5373	2.85989	9.111	5.97263	4.08707	19.7225	47.3454	28.9628	12.4671
1964	1.1848	37.193	4014	167794	28.0953	534.374	22.2537	1.03738e+10	19308166	27.4359	25.5196	9.20213	3.76896	6.38541	3.76469	5.10353	18.7297	28.811	33.3894	12.6369	15.4132	2.86414	5.6776	5.74833	4.0974	20.4268	48.5767	29.2122	13.0495
1965	1.1967	38.0682	4289	178557	30.4488	568.348	24.8518	1.13342e+10	19813947	25.7041	26.7787	10.8934	3.63898	7.73576	3.34222	4.98857	18.512	31.7073	31.3973	13.2292	16.0173	3.18916	5.55592	5.26962	4.23558	19.3936	50.6098	30.6959	12.5741
1966	1.1467	37.5637	4290	188515	30.6382	603.07	24.102	1.23548e+10	20325230	25.2805	23.1388	10.4138	3.49447	6.82474	4.18607	5.0184	18.7531	29.2683	32.4116	13.2884	14.6225	3.23503	5.99167	6.74601	4.55215	18.8997	50.9485	30.8728	13.2487
1967	1.1158	35.8805	4790	201593	31.907	654.626	22.7416	1.37771e+10	20843785	24.5707	24.2252	11.0773	3.27723	5.76897	4.07683	5.04816	18.4761	24.6138	28.4643	13.1449	17.4111	2.97626	5.76897	6.01286	4.63038	19.5147	50.7735	29.373	13.104
1968	1.1049	35.9526	4829	211703	33.6747	688.831	22.3799	1.48943e+10	21374931	25.2467	22.2295	9.92732	3.30256	6.00053	4.0812	5.08223	20.6995	23.0526	29.4008	13.1742	15.7362	2.91841	6.61038	4.99804	4.9443	21.4963	62.9474	29.2974	13.4615
1969	1.0948	36.2256	4791	226108	34.6735	755.182	22.7265	1.67801e+10	21926165	23.0018	22.4679	11.3911	3.0476	6.6204	3.75286	5.08873	21.4834	22.7723	29.5287	14.0116	15.4301	2.40546	6.55371	4.07584	4.95147	21.0722	52.5653	28.0887	14.802
1970	1.0873	36.1432	5028	243316	36.2342	806.413	25.2736	1.8418e+10	22502502	21.1995	24.6351	8.40707	2.49156	7.02944	3.82257	5.54985	21.3531	24.6555	29.8257	15.7983	11.2135	2.46085	7.44976	3.92215	5.18271	20.5489	60.9137	30.6639	15.3344
1971	1.1736	34.5665	4918	263475	39.0318	865.917	26.7826	2.03342e+10	23106806	21.2748	25.3524	10.8343	2.78807	6.41331	3.70573	5.39182	21.4341	33.1498	28.6394	16.3152	13.6294	2.13277	8.13797	4.04699	5.33855	20.12	61.5639	35.1891	15.4175
1972	1.1761	35.8144	5289	284281	40.3042	884.463	27.5856	2.13581e+10	23736489	24.6315	22.1708	10.9681	3.24792	7.25918	4.0698	5.52412	20.2048	37.3721	26.5878	16.4831	11.7955	2.50744	8.84408	3.75023	5.78705	20.3183	60.5429	28.7271	15.7339
1973	1.1366	37.7521	5419	307145	43.1808	1179.8	26.2223	2.92939e+10	24384538	24.6237	22.1003	15.9179	4.24135	8.27168	4.25298	6.669	21.9801	38.8315	27.3938	17.3947	15.3498	3.7588	9.50158	4.77595	6.38123	24.2686	61.9652	28.669	16.7685
1974	1.0909	38.5806	5582	336057	44.6003	1442.28	26.0336	3.68065e+10	25040940	27.1611	27.7089	25.1785	4.9298	8.01312	4.88208	8.17723	26.2622	40.9233	33.6759	20.4873	14.5685	5.40369	13.8837	6.08763	8.22979	31.006	64.7752	40.8975	21.595
1975	1.1241	39.2429	6024	365148	47.5507	1454.08	31.0012	3.81149e+10	25698856	26.8431	29.2344	18.3388	4.70472	7.53857	5.70639	8.21275	24.8728	43.5941	29.8237	18.7052	22.8316	4.84948	11.5056	6.72096	7.2667	26.5483	63.7921	34.5116	17.7476
1976	1.1463	39.4609	6492	386845	49.6118	1360.44	32.1028	3.66019e+10	26354140	26.8843	28.0687	18.2158	4.51047	7.03571	6.75676	7.96315	27.4286	50.3864	32.4505	19.2103	23.9223	4.32644	9.43262	6.1828	8.05001	28.5327	66.3215	31.7556	20.1524
1977	1.188	38.3066	7025	411397	50.8279	1472.96	30.892	4.06497e+10	27009755	29.3078	24.4505	24.8724	4.29846	7.25237	6.45023	7.6392	29.0533	50.9007	34.9589	20.1032	22.5229	4.08615	7.91775	6.33472	8.74627	28.3698	69.3097	31.5931	20.2871
1978	1.1656	39.6575	7395	437763	50.3337	1651.61	27.9409	4.67376e+10	27674446	31.3855	24.8727	19.5526	4.55595	6.67558	6.38117	7.93038	27.43	52.0605	28.9355	20.1058	23.7622	5.09419	7.86439	6.66157	9.00677	26.1443	68.5244	38.688	19.0845
1979	1.2165	42.4772	8018	463493	52.0002	1986.67	27.5819	5.76473e+10	28360820	34.1663	25.0026	24.8161	5.16284	7.1239	6.82055	8.74303	26.8097	54.123	25.7532	20.5791	19.0623	5.92373	9.17557	8.26017	9.59959	26.4538	65.2499	31.611	20.2013
1980	1.1907	45.2776	8582	491776	55.5091	2788.4	27.7929	8.29841e+10	29077143	34.3412	26.5458	29.3752	5.91161	9.05273	6.20405	9.80865	26.0632	53.0592	29.517	20.8448	19.1961	6.51324	11.3058	9.34801	10.2648	23.9253	66.4423	35.8998	22.3931
1981	1.2731	42.6813	9891	523847	64.6078	2935.5	29.1227	8.96295e+10	29828874	27.4706	29.4174	22.1875	7.44758	9.42035	5.99839	9.50617	25.4405	49.7051	30.4599	21.8116	26.1058	7.4496	9.79945	8.66672	9.89609	22.6742	71.5303	33.8203	23.2998
1982	1.3941	40.8347	10008	550032	69.5086	2639.52	28.9913	8.26969e+10	30611206	25.6186	26.0202	17.8338	11.0662	7.60968	6.04616	8.46666	25.1005	54.562	26.6575	21.2494	19.9147	8.67334	8.27448	8.23333	9.06379	23.2361	69.2742	31.5583	23.7111
1983	1.4784	41.4468	8290	553310	70.4436	2762.52	27.9259	8.87866e+10	31409913	23.9563	20.3471	14.5362	9.65843	11.4218	5.89896	7.61368	25.2272	62.0834	25.9499	22.2737	12.501	8.4033	9.00834	7.94044	9.03314	24.2837	62.5656	28.2128	22.5587
1984	1.52089	39.7944	9206	565851	76.9158	2667.61	25.3602	8.78805e+10	32204952	24.688	22.9273	15.7054	9.52973	13.5476	6.34941	7.48344	26.9687	60.8113	26.7499	23.6624	7.90345	9.50592	7.92439	7.81204	10.0257	27.0255	57.9622	32.054	23.5524
1985	1.5798	39.9807	9129	572603	78.5261	2051.83	24.5884	6.92085e+10	32983013	30.4421	21.8696	17.3852	8.58316	12.248	5.30976	6.97556	27.3139	66.291	25.2989	23.1432	8.51486	12.3761	7.09531	7.73065	9.59866	26.2281	51.2318	30.1465	23.5369
1986	1.6119	40.1902	8659	582052	79.9106	2380.6	21.7183	8.21079e+10	33733547	29.6016	21.0773	13.316	8.7854	8.81659	5.25081	6.99323	24.3273	68.3308	25.8484	20.2173	10.4007	11.1693	6.35458	7.10128	9.86605	24.914	49.1287	29.893	20.3585
1987	1.57	38.1942	10583	584911	81.2257	3048.94	19.5792	1.07415e+11	34463077	29.3087	19.7051	26.9419	12.8551	9.45994	5.66346	7.47285	23.8559	75.1296	21.3052	19.4317	14.7048	12.3755	6.19266	7.05799	10.4454	24.7704	48.4422	26.3975	20.5418
1988	1.571	37.7487	10457	592849	89.3474	3289.68	20.9205	1.18332e+11	35195598	28.1882	21.9026	22.8546	14.7352	10.8882	6.09862	8.46435	21.4839	70.5219	22.3712	20.1961	12.4574	15.6824	5.69254	7.53828	10.547	24.6854	43.9297	27.6038	20.8796
1989	1.5255	36.7741	9661	599519	85.3429	3508.43	22.347	1.28903e+11	35965131	25.8673	20.7238	43.9813	12.3801	8.92961	7.08984	8.91337	21.9399	59.2246	23.033	21.483	16.4104	13.2614	5.46127	8.24281	10.4465	25.5146	46.1363	30.1233	22.1923
1990	1.4056	36.4069	10873	609884	88.3577	3076.46	20.9442	1.15553e+11	36793490	23.4949	18.1877	35.3443	14.0258	8.19999	7.12745	9.2293	22.6072	55.0554	25.6926	20.812	17.686	10.6584	6.96177	8.54707	10.5313	24.4211	49.7919	31.3283	21.6133
1991	1.4795	35.0959	10600	607824	87.6802	3224.51	19.053	1.23943e+11	37692367	21.098	16.9528	41.7011	15.2786	8.67697	8.58348	9.63602	21.8958	53.0295	27.0416	21.1684	23.1755	11.4618	7.91394	8.5881	10.0995	22.2651	46.5289	28.5561	21.4985
1992	1.3973	33.6764	10991	603190	88.1239	3418.3	17.4832	1.34545e+11	38646788	20.7037	16.7837	37.5094	16.1276	10.8682	8.93583	9.68075	22.2137	48.1796	26.2604	21.1492	23.5216	14.4875	8.38509	9.697	10.212	22.9142	41.5717	26.6705	20.508
1993	1.4689	32.6897	14179	609751	88.0238	3332.74	15.8055	1.3431e+11	39619539	21.8251	17.2982	33.8299	17.9647	10.5033	9.93753	9.51922	24.063	47.0958	38.9036	20.6102	24.28	19.3538	9.09605	9.92668	10.4667	24.4173	39.1124	33.9549	18.9614
1994	1.5031	32.0438	14063	622020	91.7423	3390.49	16.0926	1.39752e+11	40558495	21.4742	19.2948	24.3102	19.2848	9.66505	9.99197	9.86405	25.2703	47.8224	37.0403	21.4619	17.9986	17.2331	9.66785	10.3036	11.1295	25.2914	40.3582	34.2258	20.0132
1995	1.557	31.9171	17087	642394	95.8742	3693.68	16.9599	1.5546e+11	41426810	22.1356	21.4753	35.7615	18.4359	7.37255	10.9579	10.6055	25.1598	50.8365	32.5917	22.4059	24.0063	16.3231	9.26011	12.1574	11.7767	24.886	43.7587	39.154	20.8661
1996	1.5015	30.8097	18504	656458	97.7536	3440.86	17.1957	1.47608e+11	42210216	24.0803	22.5871	32.2386	18.6476	6.73017	10.4943	10.7107	25.737	53.8284	25.2006	22.8224	25.4524	15.8915	8.90539	11.6729	11.9005	25.5682	37.1271	32.1115	21.1141
1997	1.55	30.1412	20336	675317	99.9291	3495.11	17.5557	1.52586e+11	42921506	23.9873	22.8579	41.7746	18.538	6.9837	10.803	11.0798	25.2941	60.8807	22.6864	25.2427	35.0854	15.0399	9.59249	12.0615	12.2643	24.8895	47.7237	31.3707	22.3386
1998	1.5085	29.4871	23600	699459	98.1579	3104.98	18.0871	1.37774e+11	43584030	25.0051	23.8916	29.6915	18.7619	7.03057	11.1342	10.4848	23.7333	49.2892	20.1693	25.7958	36.4817	14.0824	9.40808	12.8223	12.2749	24.5282	52.5519	28.728	23.2099
1999	1.464	28.5449	23938	718306	101.527	3032.31	16.1327	1.36632e+11	44233730	24.6952	22.1667	33.8695	18.6801	9.56486	11.5724	10.2683	23.6055	55.1973	20.8327	25.7199	21.9769	15.3619	11.4173	13.5124	12.9247	25.1587	43.7318	27.3595	23.5131
2000	1.4185	29.0657	25678	737788	101.64	2982	15.6161	1.36362e+11	44896856	27.1589	24.2789	51.7304	21.2357	10.1881	13.1338	10.6646	24.8438	51.8318	21.5876	28.1734	19.6502	18.5171	12.4517	14.0586	14.3185	26.6871	40.0929	31.7215	27.0859
2001	1.3565	29.5504	21901	756154	102.215	2621.55	15.51	1.21601e+11	45312937	29.3748	25.4268	45.4481	20.8386	12.3717	12.6903	9.66607	24.7379	48.6576	22.9316	27.7942	36.3648	18.2152	14.5646	13.5845	13.1371	27.0426	38.8675	33.0153	26.5225
2002	1.2544	29.693	20367	775340	99.548	2461.36	15.1503	1.15748e+11	45855483	31.7808	27.9838	35.9657	22.9903	14.2306	14.4142	9.13239	23.7735	52.1574	24.898	27.0398	27.4179	20.1027	13.3877	15.4141	13.0173	26.5688	39.6783	30.2747	25.3757
2003	1.3818	28.0077	22768	801471	107.914	3678.1	15.9815	1.75257e+11	46418194	26.8851	24.5168	39.7879	27.7742	15.1808	15.105	9.03752	23.5346	48.8269	24.0868	25.6109	35.431	24.8232	12.9596	15.8188	13.4131	25.9369	37.0072	30.0455	24.5211
2004	1.471	27.3136	23826	848316	117.789	4745.07	16.46	2.28937e+11	47001701	25.4671	25.6109	30.1608	31.7766	16.5458	18.0467	9.62537	23.4427	49.6138	26.6103	25.909	18.2874	28.4442	13.1325	19.8635	14.6696	26.0686	41.384	32.8667	25.2878
2005	1.294	27.1374	27835	913679	111.611	5277.93	17.2464	2.57671e+11	47606670	26.4467	26.7025	31.657	34.5124	15.2438	19.8244	9.9964	24.6851	52.9236	28.509	26.3688	19.0914	28.378	11.843	22.6609	15.5043	27.2539	35.5818	35.9698	26.7832
2006	1.3164	26.2356	31795	1.04618e+06	113.869	5506.2	18.9249	2.71811e+11	48233804	29.2739	31.0034	43.1113	37.1751	14.3743	21.6642	10.6548	26.7081	52.2545	22.9849	27.1758	21.498	28.4439	11.6674	24.9278	16.2188	29.1174	34.0801	32.2515	28.0114
2007	1.3016	26.5263	35001	1.182e+06	116.936	5994.2	20.647	2.99034e+11	48883845	31.1739	32.5092	33.7285	35.9483	13.3276	21.0076	11.4979	24.8628	54.5161	21.919	27.1284	30.7344	26.7164	11.9649	25.1511	16.461	27.3393	40.5886	31.9758	28.4193
2008	1.3429	28.2843	29907	1.33776e+06	125.396	5695.06	23.5113	2.871e+11	49557573	35.6224	37.243	39.8831	32.0242	13.534	24.2674	12.5144	26.8014	45.674	22.6741	27.3862	25.0898	24.9333	13.7236	29.4959	17.427	29.6665	51.0419	34.9045	29.1376
2009	1.3813	27.5836	26621	1.48656e+06	125.07	5831.12	21.5115	2.97217e+11	50255813	27.9119	27.5064	30.7686	24.3582	10.8514	20.6156	11.0117	26.1288	34.8009	20.0326	24.0716	31.0342	20.1488	11.2546	26.1615	13.7542	28.3159	51.8851	30.831	25.4962
2010	1.2633	27.3813	30549	1.67423e+06	126.485	7275.38	19.266	3.75298e+11	50979432	28.6152	27.3738	25.2641	26.2674	10.7382	22.5904	12.3783	28.2141	43.6355	20.6572	26.0432	17.3873	22.6219	11.7792	27.0984	15.8042	30.8199	51.2643	33.5702	27.9252
2011	1.214	26.9425	33484	1.95236e+06	124.762	7976.47	19.1164	4.16878e+11	51729345	30.4609	29.6517	31.3298	26.4943	11.4661	24.5404	13.5738	30.5103	48.8964	21.626	27.8035	21.4643	24.1055	12.2355	31.0835	17.3114	32.0497	52.464	38.8227	30.3655
2012	1.1832	26.6811	34604	2.02023e+06	122.988	7478.23	19.2278	3.96333e+11	52506515	29.7239	31.1758	31.4387	25.4082	11.7031	24.5344	13.6066	29.7322	48.3591	22.2274	28.5218	12.9414	22.6997	13.0623	31.2593	17.108	31.712	60.2925	35.5377	30.6786
2013	1.1486	26.6681	36070	2.11782e+06	123.825	6822.16	20.3751	3.6681e+11	53311956	30.8801	33.2722	18.0499	24.505	11.6302	25.4309	13.6393	29.666	61.5125	19.9252	28.6081	12.999	22.0603	13.9317	28.4133	16.5869	31.684	61.4366	33.2072	30.4907
2014	1.1843	26.5451	35418	2.22486e+06	125.535	6437.88	20.601	3.51119e+11	54146735	31.2055	32.9457	18.4351	24.08	11.012	23.0093	13.6471	28.2476	60.8302	18.2978	28.9091	12.4501	21.5719	13.6735	26.0019	16.5764	30.2524	53.9425	33.0028	30.8828
2015	1.1873	26.0427	36973	2.32426e+06	120.557	5744.32	20.429	3.17611e+11	55011977	30.3706	31.457	10.6319	21.9732	12.8892	19.9433	12.499	27.3813	52.2349	16.6548	29.6726	10.4924	18.4891	14.0667	22.2549	15.391	29.0952	53.5596	27.7227	31.1795
2016	1.1932	26.0091	37976	2.52586e+06	122.982	5274.55	19.5428	2.95456e+11	55908865	30.2606	30.1149		19.6441	12.4883	19.1765	11.8906	27.9163	55.4023	14.5697	29.2606		17.4153	12.1255	20.6345	14.6893	30.1096	42.243	23.3595	31.2085
